# Supplementary material for: Investigating the Role of PPARβ/δ in Retinal Vascular Remodeling Using Pparβ/δ-Deficient Mice
Source: MDPI journal article supplement (doi:10.3390/ijms21124403), 2020-06-20
Supplement: s1 [file s1]

## Supplementary data

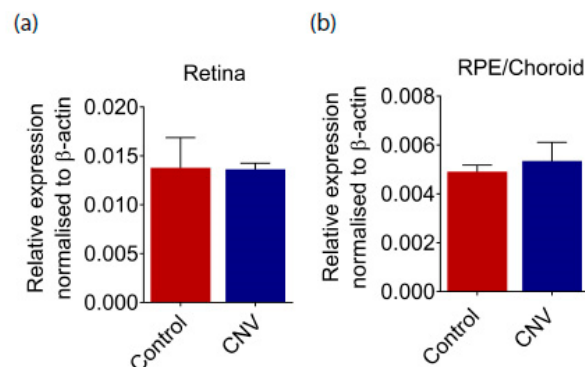

**Figure S1.** There is no change in *Pparβ/δ* expression in the retina and choroid/RPE fraction of the eye subjected to laser-induced choroidal neovascularization (CNV). **(a)** Relative gene expression of *Pparβ/δ* in wild type mouse retina subjected to laser-induced CNV ( $n = 3$ ) and age-matched controls ( $n = 2$ ), as determined by RT-qPCR analysis. **(b)** Relative gene expression of *Pparβ/δ* in wild type mouse choroid/RPE subjected to laser-induced CNV ( $n = 2$ ) and age-matched controls ( $n = 3$ ), as determined by RT-qPCR analysis. Data are expressed as mean  $\pm$  SEM. Unpaired, two-tailed t-test was used for statistical analysis.

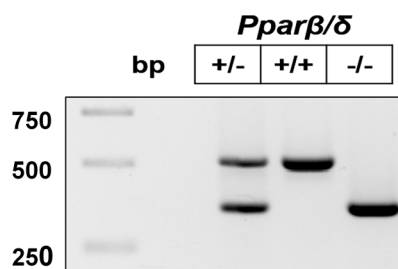

**Figure S2.** Genotyping of *Pparβ/δ*-deficient mice. Representative agarose gel showing genotyping data for *Pparβ/δ* heterozygous (+/-), wildtype (+/+), and null (-/-) mice. The *Pparβ/δ* wildtype (+) allele is represented by a band size of ~500bp, and the knockout (-) allele by a band size of ~350bp.
